# Supplementary material for: Early-life inequalities and biological ageing: a multisystem Biological Health Score approach in U nderstanding S ociety
Source: PubMed Central journal article supplement (PMC6678052; doi:10.1136/jech-2018-212010), 2019-04-03
Supplement: jech-2018-212010supp001.pdf [file jech-2018-212010supp001.pdf]

**Supplementary Table 1.** Description of the study population across all covariates by gender and age class. The percentages given in parenthesis are calculated as the proportion of the number of individuals in a covariate's level of an age class and gender to the total number of individuals in that age class and gender.

|                                           | Women (%)         |                   |                   |                   | Men (%)          |                  |                   |                   |
|-------------------------------------------|-------------------|-------------------|-------------------|-------------------|------------------|------------------|-------------------|-------------------|
|                                           | 20-40<br>(N=1330) | 41-52<br>(N=1395) | 53-64<br>(N=1268) | 65-79<br>(N=1103) | 20-40<br>(N=946) | 41-52<br>(N=985) | 53-64<br>(N=1030) | 65-79<br>(N=1031) |
| <b>Education</b>                          |                   |                   |                   |                   |                  |                  |                   |                   |
| Low                                       | 43 (3.23)         | 87 (6.24)         | 252 (19.87)       | 363 (32.91)       | 38 (4.02)        | 56 (5.69)        | 139 (13.5)        | 241 (23.38)       |
| Intermediate                              | 556 (41.8)        | 725 (51.97)       | 593 (46.77)       | 474 (42.97)       | 435 (45.98)      | 524 (53.2)       | 503 (48.83)       | 475 (46.07)       |
| High                                      | 731 (54.96)       | 583 (41.79)       | 423 (33.36)       | 266 (24.12)       | 473 (50)         | 405 (41.12)      | 388 (37.67)       | 315 (30.55)       |
| <b>Parental Education</b>                 |                   |                   |                   |                   |                  |                  |                   |                   |
| Low                                       | 116 (8.72)        | 275 (19.71)       | 431 (33.99)       | 431 (39.07)       | 76 (8.04)        | 173 (17.56)      | 348 (33.79)       | 422 (40.93)       |
| Intermediate                              | 286 (21.50)       | 266 (19.07)       | 153 (12.07)       | 120 (10.88)       | 201 (21.25)      | 213 (21.62)      | 154 (14.95)       | 99 (9.60)         |
| High                                      | 493 (37.07)       | 415 (29.75)       | 282 (22.24)       | 207 (18.77)       | 366 (38.69)      | 286 (29.04)      | 208 (20.19)       | 174 (16.88)       |
| Missing                                   | 435 (32.71)       | 439 (31.47)       | 402 (31.70)       | 345 (31.28)       | 303 (32.03)      | 313 (31.78)      | 320 (31.07)       | 336 (32.59)       |
| <b>Marital status</b>                     |                   |                   |                   |                   |                  |                  |                   |                   |
| Single                                    | 368 (27.67)       | 125 (8.96)        | 55 (4.34)         | 52 (4.71)         | 267 (28.22)      | 111 (11.27)      | 90 (8.74)         | 51 (4.95)         |
| Living as couple or married               | 886 (66.62)       | 1014 (72.69)      | 913 (72)          | 654 (59.29)       | 662 (69.98)      | 778 (78.98)      | 786 (76.31)       | 802 (77.79)       |
| Separated or divorced                     | 72 (5.41)         | 240 (17.2)        | 228 (17.98)       | 121 (10.97)       | 17 (1.8)         | 92 (9.34)        | 119 (11.55)       | 101 (9.8)         |
| Widowed                                   | 4 (0.3)           | 16 (1.15)         | 72 (5.68)         | 276 (25.02)       | 0 (0)            | 4 (0.41)         | 35 (3.4)          | 77 (7.47)         |
| <b>Household overcrowding</b>             |                   |                   |                   |                   |                  |                  |                   |                   |
| No                                        | 1083 (81.43)      | 1222 (87.6)       | 1173 (92.51)      | 1035 (93.83)      | 753 (79.6)       | 846 (85.89)      | 959 (93.11)       | 958 (92.92)       |
| Yes                                       | 246 (18.5)        | 173 (12.4)        | 95 (7.49)         | 68 (6.17)         | 192 (20.3)       | 138 (14.01)      | 70 (6.8)          | 73 (7.08)         |
| Missing                                   | 1 (0.08)          | 0 (0)             | 0 (0)             | 0 (0)             | 1 (0.11)         | 1 (0.1)          | 1 (0.1)           | 0 (0)             |
| <b>Co-morbidities</b>                     |                   |                   |                   |                   |                  |                  |                   |                   |
| None                                      | 784 (58.95)       | 714 (51.18)       | 411 (32.41)       | 225 (20.4)        | 600 (63.42)      | 543 (55.13)      | 381 (36.99)       | 233 (22.6)        |
| One                                       | 354 (26.62)       | 383 (27.46)       | 414 (32.65)       | 381 (34.54)       | 218 (23.04)      | 268 (27.21)      | 336 (32.62)       | 324 (31.43)       |
| Two or more                               | 111 (8.35)        | 256 (18.35)       | 408 (32.18)       | 475 (43.06)       | 43 (4.55)        | 119 (12.08)      | 266 (25.83)       | 448 (43.45)       |
| Missing                                   | 81 (6.09)         | 42 (3.01)         | 35 (2.76)         | 22 (1.99)         | 85 (8.99)        | 55 (5.58)        | 47 (4.56)         | 26 (2.52)         |
| <b>Number of treatments</b>               |                   |                   |                   |                   |                  |                  |                   |                   |
| None                                      | 710 (53.38)       | 662 (47.46)       | 415 (32.73)       | 183 (16.59)       | 756 (79.92)      | 626 (63.55)      | 417 (40.49)       | 177 (17.17)       |
| One                                       | 420 (31.58)       | 381 (27.31)       | 350 (27.6)        | 302 (27.38)       | 145 (15.33)      | 212 (21.52)      | 290 (28.16)       | 269 (26.09)       |
| Two or more                               | 200 (15.04)       | 352 (25.23)       | 503 (39.67)       | 618 (56.03)       | 45 (4.76)        | 147 (14.92)      | 323 (31.36)       | 585 (56.74)       |
| <b>Smoking</b>                            |                   |                   |                   |                   |                  |                  |                   |                   |
| Never                                     | 546 (41.05)       | 640 (45.88)       | 556 (43.85)       | 503 (45.6)        | 381 (40.27)      | 405 (41.12)      | 318 (30.87)       | 265 (25.7)        |
| Yes                                       | 784 (58.95)       | 755 (54.12)       | 712 (56.15)       | 600 (54.4)        | 565 (59.73)      | 580 (58.88)      | 712 (69.13)       | 766 (74.3)        |
| <b>Sports activity</b>                    |                   |                   |                   |                   |                  |                  |                   |                   |
| At least one sport                        | 984 (73.98)       | 929 (66.59)       | 761 (60.02)       | 610 (55.3)        | 734 (77.59)      | 722 (73.3)       | 671 (65.15)       | 622 (60.33)       |
| None                                      | 346 (26.02)       | 466 (33.41)       | 507 (39.98)       | 493 (44.7)        | 212 (22.41)      | 263 (26.7)       | 359 (34.85)       | 409 (39.67)       |
| <b>Alcohol consumption</b>                |                   |                   |                   |                   |                  |                  |                   |                   |
| Non-drinker                               | 146 (10.98)       | 166 (11.9)        | 166 (13.09)       | 168 (15.23)       | 54 (5.71)        | 48 (4.87)        | 76 (7.38)         | 86 (8.34)         |
| Social drinker                            | 354 (26.62)       | 352 (25.23)       | 289 (22.79)       | 219 (19.85)       | 275 (29.07)      | 306 (31.07)      | 279 (27.09)       | 266 (25.8)        |
| Moderate drinker                          | 433 (32.56)       | 364 (26.09)       | 337 (26.58)       | 335 (30.37)       | 236 (24.95)      | 195 (19.8)       | 160 (15.53)       | 193 (18.72)       |
| Daily drinker                             | 206 (15.49)       | 374 (26.81)       | 364 (28.71)       | 276 (25.02)       | 267 (28.22)      | 332 (33.71)      | 430 (41.75)       | 409 (39.67)       |
| Missing                                   | 191 (14.36)       | 139 (9.96)        | 112 (8.83)        | 105 (9.52)        | 114 (12.05)      | 104 (10.56)      | 85 (8.25)         | 77 (7.47)         |
| <b>Body Mass index (Kg/m<sup>2</sup>)</b> |                   |                   |                   |                   |                  |                  |                   |                   |
| Under 18.5                                | 30 (2.26)         | 11 (0.79)         | 9 (0.71)          | 10 (0.91)         | 10 (1.06)        | 3 (0.3)          | 4 (0.39)          | 4 (0.39)          |
| 18.5 and below 25                         | 548 (41.2)        | 475 (34.05)       | 340 (26.81)       | 289 (26.2)        | 314 (33.19)      | 193 (19.59)      | 221 (21.46)       | 193 (18.72)       |
| 25 and below 30                           | 392 (29.47)       | 448 (32.11)       | 463 (36.51)       | 396 (35.9)        | 411 (43.45)      | 439 (44.57)      | 467 (45.34)       | 485 (47.04)       |
| 30 and below 40                           | 288 (21.65)       | 366 (26.24)       | 366 (28.86)       | 333 (30.19)       | 184 (19.45)      | 314 (31.88)      | 291 (28.25)       | 286 (27.74)       |
| above 40                                  | 54 (4.06)         | 70 (5.02)         | 58 (4.57)         | 25 (2.27)         | 14 (1.48)        | 23 (2.34)        | 19 (1.84)         | 19 (1.84)         |
| Missing                                   | 18 (1.35)         | 25 (1.79)         | 32 (2.52)         | 50 (4.53)         | 13 (1.37)        | 13 (1.32)        | 28 (2.72)         | 44 (4.27)         |
