# Supplementary material for: Early-life inequalities and biological ageing: a multisystem Biological Health Score approach in U nderstanding S ociety
Source: PubMed Central journal article supplement (PMC6678052; doi:10.1136/jech-2018-212010), 2019-04-03
Supplement: jech-2018-212010supp002.pdf [file jech-2018-212010supp002.pdf]

**Supplementary Table 2.** Summary statistics of the biomarkers used to calculate the BHS. These include six physiological systems and results are presented for men (A) and women (B), and for each age group separately.

| Biomarkers                                    | Age class           |        |                     |             |                     |        |                     |             |                     |        |                     |             |                     |        |                     |             |
|-----------------------------------------------|---------------------|--------|---------------------|-------------|---------------------|--------|---------------------|-------------|---------------------|--------|---------------------|-------------|---------------------|--------|---------------------|-------------|
|                                               | 20-40 years old     |        |                     |             | 41-52 years old     |        |                     |             | 53-64 years old     |        |                     |             | 65-79 years old     |        |                     |             |
|                                               | 1 <sup>st</sup> Qu. | Mean   | 3 <sup>rd</sup> Qu. | Missing (%) | 1 <sup>st</sup> Qu. | Mean   | 3 <sup>rd</sup> Qu. | Missing (%) | 1 <sup>st</sup> Qu. | Mean   | 3 <sup>rd</sup> Qu. | Missing (%) | 1 <sup>st</sup> Qu. | Mean   | 3 <sup>rd</sup> Qu. | Missing (%) |
| <i>Endocrine System</i>                       |                     |        |                     |             |                     |        |                     |             |                     |        |                     |             |                     |        |                     |             |
| Dehydroepiandrosterone (DHEA-S) (µmol/L)      | 6.7                 | 8.92   | 10.8                | 31 (3.28)   | 4.2                 | 6.21   | 7.77                | 27 (2.74)   | 2.8                 | 4.45   | 5.7                 | 22 (2.14)   | 1.7                 | 3.02   | 3.9                 | 39 (3.78)   |
| Testosterone (nmol/L)                         | 11.5                | 16.14  | 19.9                | 31 (3.28)   | 11                  | 14.74  | 18.3                | 29 (2.94)   | 11.97               | 15.52  | 18.6                | 30 (2.91)   | 11.7                | 15.84  | 19.3                | 59 (5.72)   |
| <i>Metabolic System</i>                       |                     |        |                     |             |                     |        |                     |             |                     |        |                     |             |                     |        |                     |             |
| Glycosylated hemoglobin (HbA1c) (mmol/mol)    | 31                  | 33.65  | 36                  | 71 (7.51)   | 33                  | 36.45  | 38                  | 84 (8.53)   | 35                  | 38.19  | 40                  | 83 (8.06)   | 36                  | 40.07  | 42                  | 114 (11.06) |
| serum High-Density-Lipoprotein (HDL) (mmol/L) | 1.1                 | 1.36   | 1.6                 | 26 (2.75)   | 1.1                 | 1.35   | 1.6                 | 30 (3.05)   | 1.1                 | 1.4    | 1.6                 | 30 (2.91)   | 1.1                 | 1.4    | 1.6                 | 43 (4.17)   |
| Low-Density-Lipoprotein (LDL) (mmol/L)        | 2.32                | 2.99   | 3.55                | 29 (3.07)   | 2.69                | 3.38   | 3.99                | 39 (3.96)   | 2.47                | 3.16   | 3.84                | 36 (3.5)    | 1.92                | 2.66   | 3.28                | 44 (4.27)   |
| unfasted Triglycerides (TG) (mmol/L)          | 1.1                 | 1.96   | 2.4                 | 25 (2.64)   | 1.4                 | 2.3    | 2.9                 | 37 (3.76)   | 1.3                 | 2.13   | 2.6                 | 29 (2.82)   | 1.2                 | 1.87   | 2.3                 | 40 (3.88)   |
| <i>Cardio-vascular System</i>                 |                     |        |                     |             |                     |        |                     |             |                     |        |                     |             |                     |        |                     |             |
| Systolic blood pressure (SBP) (mmHg)          | 118.5               | 125.75 | 132.5               | 208 (21.99) | 120.62              | 129.19 | 136                 | 195 (19.8)  | 122.5               | 132.94 | 141.5               | 181 (17.57) | 122.5               | 133.69 | 143.5               | 133 (12.9)  |
| Diastolic blood pressure (DBP) (mmHg)         | 65                  | 72.27  | 78.5                | 208 (21.99) | 71                  | 78.12  | 84                  | 197 (20)    | 70                  | 77.75  | 84                  | 181 (17.57) | 65                  | 71.9   | 78                  | 130 (12.61) |
| Pulses (beats/min)                            | 59.5                | 67.27  | 74                  | 210 (22.2)  | 60.5                | 68.4   | 75                  | 195 (19.8)  | 60                  | 67.67  | 74.5                | 182 (17.67) | 58.5                | 66.19  | 72.5                | 130 (12.61) |
| <i>Inflammatory/Immune System</i>             |                     |        |                     |             |                     |        |                     |             |                     |        |                     |             |                     |        |                     |             |
| Fibrinogen (g/L)                              | 2.1                 | 2.45   | 2.8                 | 26 (2.75)   | 2.3                 | 2.67   | 3                   | 34 (3.45)   | 2.4                 | 2.79   | 3.1                 | 20 (1.94)   | 2.6                 | 2.92   | 3.2                 | 40 (3.88)   |
| C-reactive protein (CRP) (mg/L)               | 0.5                 | 1.94   | 2                   | 71 (7.51)   | 0.7                 | 2.28   | 2.5                 | 54 (5.48)   | 0.8                 | 2.55   | 2.8                 | 42 (4.08)   | 0.8                 | 2.93   | 3.4                 | 52 (5.04)   |
| Insulin Growth Factor 1 (IGF-1) (nmol/L)      | 18                  | 22.26  | 26                  | 34 (3.59)   | 15                  | 18.44  | 21                  | 34 (3.45)   | 14                  | 16.79  | 20                  | 26 (2.52)   | 12                  | 15.47  | 18                  | 40 (3.88)   |
| <i>Liver Function</i>                         |                     |        |                     |             |                     |        |                     |             |                     |        |                     |             |                     |        |                     |             |
| Alanine transaminase (ALT) (U/L)              | 23                  | 35.4   | 42.25               | 38 (4.02)   | 25                  | 36.9   | 44                  | 40 (4.06)   | 23                  | 33.69  | 38                  | 32 (3.11)   | 20                  | 27.61  | 32                  | 48 (4.66)   |
| Aspartate transaminase (AST) (U/L)            | 27                  | 33.1   | 37                  | 69 (7.29)   | 28                  | 33.59  | 37                  | 77 (7.82)   | 27                  | 32.9   | 36                  | 76 (7.38)   | 26                  | 31.45  | 35                  | 84 (8.15)   |
| Gamma glutamyltransferase (GGT) (U/L)         | 18                  | 35.65  | 41                  | 28 (2.96)   | 22                  | 42.83  | 51                  | 36 (3.65)   | 23                  | 43.48  | 51                  | 46 (4.47)   | 21                  | 37.77  | 44                  | 48 (4.66)   |
| <i>Kidney Function</i>                        |                     |        |                     |             |                     |        |                     |             |                     |        |                     |             |                     |        |                     |             |
| Creatinine (enzymatic) (µmol/L)               | 75                  | 82.14  | 89                  | 18 (1.9)    | 76                  | 84.14  | 92                  | 23 (2.34)   | 74                  | 84.12  | 92                  | 26 (2.52)   | 77                  | 88.64  | 97                  | 48 (4.66)   |

| Biomarkers                                    | Age class           |       |                     |             |                     |       |                     |             |                     |       |                     |             |                     |       |                     |             |
|-----------------------------------------------|---------------------|-------|---------------------|-------------|---------------------|-------|---------------------|-------------|---------------------|-------|---------------------|-------------|---------------------|-------|---------------------|-------------|
|                                               | 20-40 years old     |       |                     |             | 41-52 years old     |       |                     |             | 53-64 years old     |       |                     |             | 65-79 years old     |       |                     |             |
|                                               | 1 <sup>st</sup> Qu. | Mean  | 3 <sup>rd</sup> Qu. | Missing (%) | 1 <sup>st</sup> Qu. | Mean  | 3 <sup>rd</sup> Qu. | Missing (%) | 1 <sup>st</sup> Qu. | Mean  | 3 <sup>rd</sup> Qu. | Missing (%) | 1 <sup>st</sup> Qu. | Mean  | 3 <sup>rd</sup> Qu. | Missing (%) |
| <i>Endocrine System</i>                       |                     |       |                     |             |                     |       |                     |             |                     |       |                     |             |                     |       |                     |             |
| Dehydroepiandrosterone (DHEA-S) (µmol/L)      | 3.5                 | 5.49  | 7                   | 60 (4.51)   | 2.5                 | 4     | 5.2                 | 36 (2.58)   | 1.6                 | 2.78  | 3.6                 | 36 (2.84)   | 1.1                 | 2.09  | 2.7                 | 34 (3.08)   |
| <i>Metabolic System</i>                       |                     |       |                     |             |                     |       |                     |             |                     |       |                     |             |                     |       |                     |             |
| Glycosylated hemoglobin (HbA1c) (mmol/mol)    | 31                  | 33.37 | 35                  | 117 (8.8)   | 32                  | 35.01 | 37                  | 120 (8.6)   | 35                  | 37.73 | 40                  | 115 (9.07)  | 36                  | 39.21 | 41                  | 124 (11.24) |
| serum High-Density-Lipoprotein (HDL) (mmol/L) | 1.3                 | 1.61  | 1.9                 | 41 (3.08)   | 1.4                 | 1.69  | 2                   | 33 (2.37)   | 1.4                 | 1.75  | 2                   | 39 (3.08)   | 1.4                 | 1.72  | 2                   | 28 (2.54)   |
| Low-Density-Lipoprotein (LDL) (mmol/L)        | 2.16                | 2.7   | 3.16                | 47 (3.53)   | 2.5                 | 3.1   | 3.64                | 39 (2.8)    | 2.75                | 3.4   | 4.03                | 52 (4.1)    | 2.41                | 3.18  | 3.92                | 33 (2.99)   |

|                                          |     |        |       |            |     |        |       |             |        |        |       |             |        |        |        |             |
|------------------------------------------|-----|--------|-------|------------|-----|--------|-------|-------------|--------|--------|-------|-------------|--------|--------|--------|-------------|
| unfasted Triglycerides (TG) (mmol/L)     | 0.8 | 1.29   | 1.6   | 45 (3.38)  | 0.9 | 1.51   | 1.9   | 38 (2.72)   | 1.1    | 1.73   | 2.2   | 48 (3.79)   | 1.2    | 1.75   | 2.1    | 30 (2.72)   |
| <i>Cardio-vascular System</i>            |     |        |       |            |     |        |       |             |        |        |       |             |        |        |        |             |
| Systolic blood pressure (SBP) (mmHg)     | 106 | 113.14 | 119.5 | 270 (20.3) | 109 | 119.17 | 127.5 | 262 (18.78) | 115.75 | 127.43 | 137.5 | 213 (16.8)  | 121.62 | 133.21 | 143.88 | 149 (13.51) |
| Diastolic blood pressure (DBP) (mmHg)    | 63  | 69.96  | 76    | 270 (20.3) | 67  | 74.13  | 81    | 262 (18.78) | 68.5   | 75.05  | 82    | 214 (16.88) | 65     | 71.6   | 78.25  | 148 (13.42) |
| Pulses (beats/min)                       | 64  | 71     | 77.5  | 270 (20.3) | 63  | 69.75  | 76    | 263 (18.85) | 63     | 69.55  | 75.5  | 213 (16.8)  | 62.5   | 69.27  | 75.5   | 148 (13.42) |
| <i>Inflammatory/Immune System</i>        |     |        |       |            |     |        |       |             |        |        |       |             |        |        |        |             |
| Fibrinogen (g/L)                         | 2.3 | 2.66   | 3     | 47 (3.53)  | 2.4 | 2.76   | 3     | 36 (2.58)   | 2.5    | 2.91   | 3.27  | 42 (3.31)   | 2.6    | 3      | 3.3    | 37 (3.35)   |
| C-reactive protein (CRP) (mg/L)          | 0.6 | 2.93   | 3.3   | 87 (6.54)  | 0.6 | 2.62   | 2.9   | 77 (5.52)   | 0.8    | 3.24   | 3.8   | 70 (5.52)   | 0.9    | 3.34   | 3.88   | 53 (4.81)   |
| Insulin Growth Factor 1 (IGF-1) (nmol/L) | 18  | 22.73  | 27    | 58 (4.36)  | 14  | 17.86  | 21    | 41 (2.94)   | 12     | 15.13  | 18    | 40 (3.15)   | 11     | 14.24  | 17     | 30 (2.72)   |
| <i>Liver Function</i>                    |     |        |       |            |     |        |       |             |        |        |       |             |        |        |        |             |
| Alanine transaminase (ALT) (U/L)         | 15  | 21.79  | 25    | 56 (4.21)  | 16  | 22.77  | 26    | 59 (4.23)   | 19     | 25.55  | 30    | 56 (4.42)   | 18     | 23.92  | 27     | 35 (3.17)   |
| Aspartate transaminase (AST) (U/L)       | 23  | 26.69  | 29    | 108 (8.12) | 23  | 27.45  | 30    | 99 (7.1)    | 25     | 29.15  | 32    | 96 (7.57)   | 25     | 29.29  | 32     | 70 (6.35)   |
| Gamma glutamyltransferase (GGT) (U/L)    | 12  | 20.61  | 23    | 49 (3.68)  | 13  | 24.37  | 28    | 51 (3.66)   | 16     | 29.54  | 34    | 58 (4.57)   | 16     | 27.86  | 32.75  | 41 (3.72)   |
| <i>Liver Function</i>                    |     |        |       |            |     |        |       |             |        |        |       |             |        |        |        |             |
| Creatinine (enzymatic) (μmol/L)          | 58  | 64.62  | 71    | 36 (2.71)  | 59  | 66.65  | 73    | 36 (2.58)   | 59     | 67.16  | 73    | 33 (2.6)    | 61     | 70.41  | 77     | 41 (3.72)   |
