# Supplementary material for: Early-life inequalities and biological ageing: a multisystem Biological Health Score approach in U nderstanding S ociety
Source: PubMed Central journal article supplement (PMC6678052; doi:10.1136/jech-2018-212010), 2019-04-03
Supplement: jech-2018-212010supp003.pdf [file jech-2018-212010supp003.pdf]

**Supplementary Table 3.** Distribution of the number of missing (and subsequently imputed) biomarkers. Results are presented for men and women separately. For each number of imputed variables, we report the cumulative proportion of the full study population with less than this number of imputed variables.

| Number of Imputed Biomarkers            | 0     | 1     | 2     | 3     | 4     | 5     | 6     | 7     | 8     | 9     | 10    | 11    | 12    | 13    | 14    | 15   |
|-----------------------------------------|-------|-------|-------|-------|-------|-------|-------|-------|-------|-------|-------|-------|-------|-------|-------|------|
| Men                                     | 2,782 | 524   | 98    | 608   | 149   | 28    | 9     | 2     | 9     | 7     | 2     | 22    | 28    | 39    | 6     | 7    |
| Women                                   | 3,535 | 632   | 135   | 791   | 146   | 24    | 10    | 2     | 6     | 1     | 29    | 41    | 42    | 14    | 6     | 0    |
| Total                                   | 6,317 | 1,156 | 233   | 1,399 | 295   | 52    | 19    | 4     | 15    | 8     | 31    | 63    | 70    | 53    | 12    | 7    |
| Cumulative proportion of the population | 64.9% | 76.8% | 79.2% | 93.5% | 96.6% | 97.1% | 97.3% | 97.3% | 97.5% | 97.6% | 97.9% | 98.5% | 99.3% | 99.8% | 99.9% | 100% |
